# Supplementary material for: Clinical relevance of MRI knee abnormalities in Australian rules football players: a longitudinal study
Source: HighWire-hosted journal article supplement (doi:10.1136/bmjsem-2021-001097), 2021-09-01
Supplement: bmjsem-2021-001097supp001_data_supplement.pdf [file bmjsem-2021-001097supp001_data_supplement.pdf]

**Supplementary Files**

| Supplementary Table 1. Magnetic resonance imaging sequences and parameters                            |                                                                                                                                                                                               |
|-------------------------------------------------------------------------------------------------------|-----------------------------------------------------------------------------------------------------------------------------------------------------------------------------------------------|
| Sequence                                                                                              | Parameters                                                                                                                                                                                    |
| A 2-dimensional proton density-weighted fat saturation fast spin echo acquisition sequence (2D-PD-FS) | Sagittal plane, flip angle 150°, repetition time 4550 ms, echo time 39 ms, field of view 16 cm, 512 x 512 pixel matrix, and slice thickness of 3.0 mm without an interslice gap               |
| A 3-dimensional fat saturation Double Echo in the Steady State acquisition sequence (3D-DESS-FS)      | Sagittal plane, flip angle 25°, repetition time 21 ms, echo time 7.8 ms, field of view 15 cm, 640 x 640 reconstruction pixel matrix, and slice thickness of 1.25 mm without an interslice gap |
| An In/Out phase T1-weighted gradient echo sequence, InOutGRE                                          | Axial plane, flip angle 70°, repetition time 450 ms, echo times in/out 5.4/27 ms, number of average 20 x 260 pixel matrix, and slice thickness of 3 mm without interslice gap.                |
